1  
2  
3  
4  
5  
6  
7  
8  
9  
10  
11  
12  
13  
14  
15  
16

### Effects of amotosalen treatment on human platelet lysate bioactivity

Christian Christensen<sup>1,2,3</sup>, Sandra Mjoll Jonsdottir-Buch<sup>1,2,3</sup>, Olafur Eysteinn Sigurjonsson<sup>1,2,3,4\*</sup>

<sup>1</sup> The Blood Bank, The National University Hospital of Iceland, Reykjavik, Iceland

<sup>2</sup> Faculty of Medicine, Biomedical Center, University of Iceland, Reykjavik, Iceland

<sup>3</sup> Platome Biotechnology, Hafnarfjörður, Iceland

<sup>4</sup> School of Science and Engineering, University of Reykjavik, Reykjavik, Iceland

\* Corresponding author

E-mail: oes@landspitali.is (OES)

## 17 **Abstract**

18 **Background:** Clinical application of mesenchymal stromal cells (MSCs) usually requires an *in*  
19 *vitro* expansion step to reach clinically relevant numbers. *In vitro* cell expansion necessitates  
20 supplementation of basal mammalian cell culture medium with growth factors. To avoid using  
21 supplements containing animal substances, human platelet lysates (hPL) produced from expired and  
22 pathogen inactivated platelet concentrates can be used in place of fetal bovine serum. Due to lack of  
23 experience and global diversity in bacterial detection strategies, most transfusion units are currently not  
24 pathogen inactivated. As blood banks are the sole source of platelet concentrates for hPL production, it  
25 is important to ensure product safety and standardized production methods. To achieve these aims, we  
26 assessed the quality of hPL produced from expired platelet concentrates with pathogen inactivation  
27 applied after platelet lysis, as well as its ability to support MSC proliferation and tri-lineage  
28 differentiation.

29 **Methodology/principal findings:** Bone marrow-derived MSCs (BM-MSCs) were  
30 expanded and differentiated using hPL derived from pathogen inactivated platelet lysates (hPL-PIPL),  
31 with pathogen inactivation applied after lysis of expired platelets. Results were compared to those using  
32 hPL produced from conventional expired pathogen inactivated human platelet concentrates (hPL-PIPC),  
33 with pathogen inactivation applied after soon after blood donation. hPL-PIPL treatment had lower  
34 concentrations of soluble growth factors and cytokines than hPL-PIPC treatment. When used as  
35 supplementation in cell culture, BM-MSCs proliferated at a reduced rate, but more consistently, in hPL-  
36 PIPL than in hPL-PIPC. The ability to support tri-lineage differentiation was comparable between  
37 lysates.

38 **Conclusion/significance:** These results suggest that functional hPL can be produced from  
39 expired and untreated platelet lysates by applying pathogen inactivation after platelet lysis. When carried  
40 out post-expiration, pathogen inactivation can provide a valuable tool to further standardize global hPL

41 production methods, increase the pool of starting material, and meet the future demand for animal-free  
42 supplements in human cell culturing.

43

## 44 Introduction

45 Pathogen inactivation systems are proactive alternatives to conventional bacterial screening and  
46 prevention methods for blood transfusion products [1]. Several systems are currently available on the  
47 market such as the INTERCEPT™ Blood System, Mirasol™ and THERAFLEX™ [2]. The  
48 INTERCEPT™ Blood System for pathogen inactivation of platelets gained the CE mark in 2002 [3]  
49 and is routinely used in several European countries [4]. The system effectively reduces the accumulation  
50 of pathogens by blocking their ability to replicate [3]. The active compound used in the INTERCEPT  
51 System, amotosalen S-59, passes through cell membranes, bacterial walls, and viral envelopes and  
52 intercalates between helical regions of DNA and RNA [5]. Covalent crosslinks are formed between  
53 amotosalen S-59 and pyrimidine bases upon exposure to UV-A illumination, leaving pathogenic  
54 organisms unable to replicate [3].

55 Implementing a pathogen inactivation system improves the safety of transfusion units and allows  
56 platelets to be stored for an extended period of up to seven days [3]. Blood banks must stock surplus  
57 transfusion units; with approximately 2 million reported annual platelet transfusions in the United States  
58 alone [6], this inevitably results in large quantities of expired platelets [7]. Although expired platelet  
59 concentrates are unfit for transfusion medicine due to safety concerns, their abundance of growth factors  
60 makes them suitable for use in cell cultures [8].

61 Human mesenchymal stromal cells (MSCs) are multipotent cells capable of undergoing *in vivo*  
62 differentiation into end-stage cell types of connective tissues [9]. They were initially described, in the  
63 1960s, as plastic-adherent and fibroblast-like cells with clonogenic potential *in vitro* [10]. Today, they  
64 are recognized as a part of stem cell niches in the bone marrow [11] and are known to play a role in  
65 immunomodulation [12], as demonstrated by the prominent contribution of the cells in reversing graft-  
66 versus-host-disease [13]. Scientific interest in MSCs has developed in recent years, making them one of  
67 the most-studied human cell types related to cell-based therapy [14].

68 An *in vitro* expansion step is usually necessary to attain clinically relevant numbers of MSCs  
69 [15]. Successful expansion of MSCs requires that basal cell culture medium be supplemented with a  
70 source of mitogens, such as growth factors. To date, this has mostly been performed using fetal bovine

71 serum (FBS), which contains low amounts of immunoglobins and complement factors [16]. However,  
72 concerns regarding the content of animal components and large lot-to-lot variability has initiated a quest  
73 for replacements [16–18]. Platelet derivatives such as human platelet lysates (hPL) are currently  
74 considered promising replacements for FBS [8,19–22] due to their non-xenogeneic nature and  
75 abundance of growth factors [23]. hPL has successfully been produced from fresh platelets [24], expired  
76 platelets [8], and, most recently, from expired and pathogen inactivated platelets [22]; all have been  
77 found to either be comparable to or to outperform FBS.

78 hPL is commonly manufactured by exposing platelet concentrates to repetitive cycles of  
79 freezing and thawing, resulting in degranulation [21], but it can also be produced by  $\text{CaCl}_2$  activation  
80 [25], sonication [26], or by using a solvent/detergent strategy [27]. Degranulation causes the  $\alpha$ -granules  
81 to release growth factors and cytokines into solution [28]. To obtain a sufficient volume of hPL,  
82 allogeneic hPL are typically pooled using up to 120 donors [29]; however, recent research has  
83 demonstrated that pooling can be done effectively using up to 250 donors [30]. The end product is  
84 refined by centrifugation and sterile filtration to remove platelet fragments [29].

85 Recently, emphasis has been placed on improving standardization in global good manufacturing  
86 practice (GMP)-grade hPL production, as current production methods vary between manufacturers [31].  
87 Although pathogen inactivation techniques have recently been introduced into the preparation of  
88 transfusion products, they are predominantly applied in Europe, while blood banks in the United States  
89 and Asia primarily rely on bacterial screening systems such as BacT/ALERT to ensure product safety  
90 [32]. As a result, most platelets used for hPL production are currently not pathogen inactivated.

91 In this study, hPL from pathogen inactivated platelet lysates (hPL-PIPL) was compared to hPL  
92 produced from conventional pathogen inactivated platelet concentrates (hPL-PIPC). We evaluated and  
93 compared the total protein content and concentrations of selected soluble growth factors and cytokines  
94 between hPL-PIPL and hPL-PIPC. Furthermore, we compared long-term proliferation and tri-lineage  
95 differentiation of bone marrow-derived MSCs using hPL-PIPL and hPL-PIPC as cell culture media  
96 supplements.

97

## 98 **Results**

### 99 **Growth factor and cytokine concentrations are lower in hPL-PIPL** 100 **than in hPL-PIPC**

101 Quantification of 37 soluble growth factors and cytokines was performed using Luminex xMAP  
102 technology following platelet lysate production. Each of the measured growth factors and cytokines was  
103 present at lower concentrations in hPL-PIPL than in hPL-PIPC (Table 1). The mean decreases for all  
104 evaluated growth factors and cytokines in hPL-PIPL (as compared to hPL-PIPC) for two produced  
105 batches were  $29 \pm 15\%$  ( $p < 0.001$ ) and  $36 \pm 19\%$  ( $p < 0.001$ ). The mean differences between hPL-PIPL  
106 and hPL-PIPC in key growth factors for the two batches ranged from 4.2 to 36%: PDGF-AB/BB ( $4.2 \pm$   
107  $1.8\%$ ); PDGF-AA ( $12 \pm 17\%$ ), EGF ( $23.9 \pm 7.8\%$ ); VEGF ( $26.6 \pm 0.62\%$ ); and FGF-2 ( $36.3 \pm 1.8\%$ ).

108

109

110 **Table 1. Growth factor and cytokine concentrations in two batches of undiluted hPL.**

| Growth<br>Factor / Cytokine | Batch 23 |          |                         | Batch 24 |          |            | Batch 23 vs.<br>Batch 24 |
|-----------------------------|----------|----------|-------------------------|----------|----------|------------|--------------------------|
|                             | hPL-PIPC | hPL-PIPL | Difference <sup>a</sup> | hPL-PIPC | hPL-PIPL | Difference | Mean ± SD <sup>b</sup>   |
|                             | pg/mL    | pg/mL    | %                       | pg/mL    | pg/mL    | %          | %                        |
| EGF                         | 1992     | 1361     | 32                      | 346      | 291      | 16         | 22.9 ± 7.8               |
| Eotaxin                     | 96       | 53       | 45                      | 129      | 88       | 32         | 38.2 ± 6.7               |
| FGF-2                       | 517      | 320      | 38                      | 478      | 313      | 34         | 36.3 ± 1.8               |
| Fractalkine                 | 234      | 196      | 16                      | 164      | 105      | 36         | 26 ± 10                  |
| G-CSF                       | 49       | 27       | 44                      | 57       | 27       | 53         | 48.5 ± 4.1               |
| GM-CSF                      | 27       | 20       | 26                      | 27       | 14       | 48         | 37 ± 11                  |
| IFN $\alpha$ 2              | 76       | 49       | 35                      | 84       | 44       | 47         | 41.2 ± 6.2               |
| IFN $\gamma$                | 14       | 12       | 19                      | 14       | 8.5      | 40         | 29 ± 11                  |
| IL-1 $\alpha$               | 59       | 50       | 16                      | 29       | 19       | 35         | 25.4 ± 9.6               |
| IL-1 $\beta$                | 5.5      | 3.4      | 38                      | 6.4      | 2.6      | 59         | 48 ± 11                  |
| IL-1RA                      | 503      | 452      | 10                      | 1030     | 884      | 14         | 12.2 ± 2.0               |
| IL-2                        | 7.8      | 6.1      | 23                      | 4.0      | 1.8      | 55         | 39 ± 16                  |
| IL-3                        | 6.3      | 4.3      | 32                      | 6.2      | 3.1      | 49         | 40.6 ± 8.4               |
| IL-4                        | 31       | 17       | 47                      | 48       | 27       | 44         | 45.5 ± 1.1               |
| IL-5                        | 34       | 28       | 16                      | 82       | 69       | 16         | 15.7 ± 0.0               |
| IL-6                        | 13       | 7.9      | 40                      | 12       | 3.3      | 72         | 56 ± 16                  |
| IL-7                        | 30       | 20       | 32                      | 36       | 22       | 40         | 36.4 ± 3.9               |
| IL-8                        | 50       | 38       | 24                      | 76       | 64       | 16         | 19.9 ± 3.8               |
| IL-9                        | 10       | 7.2      | 29                      | 6.5      | 3.9      | 39         | 34.3 ± 5.0               |
| IL-10                       | 20       | 14       | 30                      | 7        | 2.4      | 65         | 48 ± 18                  |
| IL-12p40                    | 61       | 51       | 16                      | 62       | 32       | 49         | 33 ± 16                  |
| IL-12p70                    | 11       | 6.2      | 44                      | 12       | 6.2      | 47         | 45.5 ± 1.5               |
| IL-13                       | 183      | 176      | 3.7                     | 433      | 372      | 14         | 8.8 ± 5.2                |
| IL-15                       | 12       | 6.6      | 45                      | 8.6      | 3.6      | 59         | 51.6 ± 7.1               |

|                      |       |       |         |       |         |      |            |
|----------------------|-------|-------|---------|-------|---------|------|------------|
| IL-17A               | 14    | 14    | 4.1     | 10    | 5.5     | 43   | 23 ± 19    |
| IP-10                | 120   | 58    | 52      | 101   | 51      | 49   | 50.7 ± 1.4 |
| MCP-1                | 157   | 111   | 30      | 185   | 157     | 15   | 22.4 ± 7.4 |
| MCP-3                | 301   | 276   | 8.3     | 520   | 491     | 5.7  | 7.0 ± 1.3  |
| MDC                  | 705   | 192   | 73      | 754   | 230     | 69   | 71.1 ± 1.7 |
| MIP-1 $\alpha$       | 24    | 22    | 11      | 33    | 30      | 8.8  | 9.8 ± 1.0  |
| MIP-1 $\beta$        | 123   | 82    | 34      | 165   | 127     | 23   | 28.4 ± 5.4 |
| PDGF-AA              | 15850 | 11232 | 29      | 9105  | 9548    | -4.9 | 12 ± 17    |
| PDGF-AB/BB           | 27802 | 27146 | 2.4     | 25157 | 23661   | 5.9  | 4.2 ± 1.8  |
| TGF- $\alpha$        | 3.0   | 1.8   | 40      | 4.1   | 1.9     | 53   | 46.5 ± 6.5 |
| TNF $\alpha$         | 24    | 16    | 35      | 26    | 15      | 42   | 38.5 ± 3.5 |
| TNF $\beta$          | 266   | 236   | 11      | 570   | 490     | 14   | 12.7 ± 1.4 |
| VEGF                 | 538   | 392   | 27      | 441   | 327     | 26   | 26.6 ± 0.6 |
| Mean ± SD (%)        |       |       | 29 ± 15 |       | 36 ± 19 |      | 32 ± 16    |
| p-value <sup>c</sup> |       |       | < 0.001 |       | < 0.001 |      | < 0.001    |

111 <sup>a</sup> Difference (%) between hPL-PIPC and hPL-PIPL within individual batches (Batch 23 and Batch 24). Note that  
 112 the concentrations for all growth factors and cytokines were lower in hPL-PIPL.

113 <sup>b</sup> Mean ± SD (%) represents the mean difference between hPL-PIPC and hPL-PIPL for both batches (n = 4).

114 <sup>c</sup> p-values are reported on the overall differences between treatments (hPL-PIPC and hPL-PIPL) in individual  
 115 batches (23 and 24) and for both batches combined. p-values were determined using a paired ratio t-test.

116



## 117 **Proliferation of MSCs in hPL-PIPL is comparable to, but slower** 118 **than, that in hPL-PIPC**

119 Proliferation of MSCs originating from the bone marrow of two individual donors were assessed  
120 during nine cell passages (Fig 1). Cumulative population doublings (CPDs) were assessed from passage  
121 4 through passage 9. MSCs grown in cell culture media supplemented with hPL-PIPL (hPL-PIPL-  
122 MSCs) proliferated significantly slower than hPL-PIPC-MSCs ( $p < 0.001$ ) from passage 5 through  
123 passage 9. At the end of passage 9, MSCs from Donor 6 had reached  $19.42 \pm 0.10$  CPDs and  $21.25 \pm$   
124  $0.03$  CPDs with hPL-PIPL and hPL-PIPC supplementation, respectively, and MSCs from Donor 13 had  
125 reached  $10.50 \pm 0.40$  CPDs and  $12.80 \pm 0.20$  CPDs.

126

127

128

### 129 **Fig 1. Long-term proliferation of MSCs, expressed as cumulative population doublings.**

130 Proliferation of MSCs from two donors (D6 and D13) was evaluated in cell culture media supplemented  
131 with hPL-PIPC or hPL-PIPL after passage 3 (indicated by the vertical dotted line). Points represent  
132 mean  $\pm$  SEM at the end of each passage ( $n = 6$  cell cultures per passage, assessed in two independent  
133 experiments). Asterisks ( $* p < 0.05$ ) indicate statistical significance between hPL-PIPC and hPL-PIPL  
134 for an individual donor, evaluated via a two-way ANOVA with Tukey's post hoc test.

135

## 136 **Tri-lineage differentiation is not affected by the timing of pathogen** 137 **inactivation**

138 hPL-PIPL-MSCs were successfully differentiated into osteogenic, adipogenic and chondrogenic  
139 lineages. Osteogenic differentiation was evaluated during 28 days of stimulation in osteogenic media.  
140 Alkaline phosphatase (ALP) activities in both hPL-PIPL-MSCs and hPL-PIPC-MSCs were significantly  
141 elevated after seven days as compared to unstimulated control cultures ( $p < 0.05$ ) (Fig 2). A peak in  
142 ALP activity was observed at day 14 for both hPL-PIPL-MSCs ( $3.6 \pm 0.1$  nmol (p-nitrophenol)/min)

143 and hPL-PIPC-MSCs ( $3.8 \pm 0.1$  nmol (p-nitrophenol)/min), followed by fairly consistent ALP activity  
144 between days 14 and 28. Comparable mineralization between hPL-PIPC and hPL-PIPL MSCs was  
145 demonstrated by Alizarin Red S staining after 28 days of differentiation (Figs 3A and B).

146

147

148

149

150 **Fig 2. Alkaline phosphatase activity during osteogenic differentiation.** MSCs were differentiated in  
151 osteogenic media supplemented with hPL-PIPL or hPL-PIPC, with MSCs grown in expansion media  
152 included as a control. Points represent means  $\pm$  SEM (n = 6 cell cultures per timepoint, assessed in two  
153 independent experiments). Asterisks (\* p < 0.05) indicate statistical significance versus the control,  
154 evaluated via a two-way ANOVA with Tukey's post hoc test.

155

156

157

158

159 **Fig 3. Tri-lineage differentiation of MSCs.** MSCs differentiated using hPL-PIPC are shown in A, C,  
160 and E, while MSCs differentiated using hPL-PIPL are shown in B, D, and F. A and B show Alizarin  
161 Red S staining, used to demonstrate mineralization (black arrows) after 28 days of stimulation in  
162 osteogenic medium. C and D show Oil Red O staining, used to demonstrate accumulation of lipid  
163 droplets (black arrows) after 14 days of stimulation in adipogenic medium. E and F show Masson's  
164 trichrome staining, used to demonstrate collagen fibers (black arrows) and lacunae formation (yellow  
165 arrows) after 35 days of chondrogenic stimulation.

166

167

168

169

170 Adipogenic differentiation was evaluated during 14 days of stimulation in adipogenic media.  
171 Accumulation of lipid droplets in the cell periphery was confirmed by positive Oil Red O staining after  
172 7 days. After 14 days of differentiation, lipid droplets were distributed throughout the cells (Figs 3C and  
173 D).

174 Chondrogenic differentiation was evaluated during 35 days of stimulation in chondrogenic media.  
175 After 28 days of differentiation, the concentration of glycosaminoglycans (GAGs) was significantly  
176 higher ( $p < 0.05$ ) in cell pellets supplemented with both hPL-PIPC and hPL-PIPL than in unstimulated  
177 control cell pellets (Fig 4). GAG concentration remained significantly higher than the control during  
178 differentiation of hPL-PIPC-MSCs at day 35 ( $p < 0.05$ ), while GAG concentration decreased again in  
179 hPL-PIPL-MSCs by day 35 such that there was no longer a significant difference from the control. No  
180 statistically significant differences were observed between hPL-PIPC-MSCs and hPL-PIPL-MSCs.  
181 Lacunae formation and accumulation of collagen fibers were demonstrated after 35 days of  
182 differentiation using Masson's trichrome staining (Figs 3E and F).

183

184

185

186

187

188

189 **Fig 4. Concentration of glycosaminoglycans.** GAG concentration was measured in MSC pellets  
190 stimulated with chondrogenic media supplemented with either hPL-PIPC or hPL-PIPL. Pellets grown  
191 in expansion media were included as a control. Points represent mean  $\pm$  SEM ( $n = 2$  pellets per timepoint,  
192 assessed in two individual experiments). Asterisks ( $* p < 0.05$ ) indicate statistical significance versus  
193 the control, evaluated via a two-way ANOVA with Tukey's post hoc test.

194

## 195 Discussion

196 In this study, hPL derived from pathogen inactivated platelet lysates (hPL-PIPL) was compared  
197 to conventional hPL derived from pathogen inactivated platelet concentrates (hPL-PIPC). We evaluated  
198 the composition of the lysates as well as their applicability for use as supplements to support BM-MSC  
199 proliferation and tri-lineage differentiation.

200 Concentrations of all 37 selected soluble growth factors and cytokines were significantly reduced  
201 in hPL-PIPL compared to hPL-PIPC, with an average difference of  $32 \pm 16\%$  ( $p < 0.001$ ). Of the key  
202 growth factors, we found that the differences between hPL-PIPC and hPL-PIPL in PDGF-AB/BB and  
203 PDGF-AA were relatively small, at  $4.2 \pm 1.8\%$  and  $12 \pm 17\%$ , respectively. The effects on EGF, VEGF,  
204 and FGF-2 were slightly higher, with observed reductions in hPL-PIPL of  $23.9 \pm 7.8\%$ ,  $26.57 \pm 0.62$ ,  
205 and  $36.3 \pm 1.8\%$ , respectively. As several growth factors within the  $\alpha$ -granules of the platelets are  
206 important for MSC proliferation and differentiation [33,34], the composition following production and  
207 storage is an important marker for platelet lysate quality. The effects of pathogen inactivation on growth  
208 factor stability during storage have previously been studied. It was demonstrated that UVC treatment of  
209 platelet concentrates had no effect on concentrations of EFG, FGF-2, PDGF-AB, VEGF, or IGF [35].  
210 In a study specifically conducted on the INTERCEPT™ Blood System for pathogen inactivation, it was  
211 found that amotosalen plus UVA treatment mainly targets proteins of intracellular platelet activation  
212 pathways [36]. In addition, UV illumination of platelets combined with riboflavin or amotosalen seems  
213 to trigger activation of p38 mitogen-activated protein kinases (p38MAPK), leading to platelet  
214 degranulation [37]. However, to our knowledge this is the first study evaluating the effect of pathogen  
215 inactivation on lysed platelets compared to intact platelet concentrates. It can be speculated that, as a  
216 result of platelet cargo being released into solution of hPL-PIPL at the time of pathogen inactivation,  
217 the difference in composition between hPL-PIPC and hPL-PIPL is caused by UVA photodegradation,  
218 since light exposure can lead to irreversible changes in the primary, secondary, and tertiary structure of  
219 proteins [38].

220 As it has been suggested that hPL should contain high concentrations of PDGF-AB, VEGF,  
221 EGF, FGF-2, and TGF- $\beta$ 1, and low concentrations of IGF-1, we examined the long-term proliferation  
222 of MSCs from two donors in terms of cumulative population doublings (CPDs). Total CPDs were higher

223 for both of the donor hPL-PIPC-MSCs than for the hPL-PIPL-MSCs, indicating higher mitogenic effects  
224 in conventional hPL-PIPC. It is evident that EGF and VEGF activate the Raf-MEK-ERK pathway by  
225 binding to transmembrane receptor proteins at the plasma membrane [39]. Less activation of the Raf-  
226 MEK-ERK pathway may contribute to less cell proliferation and failure to prevent apoptosis. However,  
227 it is important to mention that high CPDs should not be viewed as a success criterion in isolation;  
228 successful expansion of MSCs must also include retention of genomic stability and avoidance of  
229 tumorigenicity [40].

230 Tri-lineage differentiation potential was examined *in vitro* by stimulating MSCs in osteogenic,  
231 adipogenic, and chondrogenic media. After 14 days of differentiation, both hPL-PIPC-MSCs and hPL-  
232 PIPL-MSCs differentiating into osteoblasts demonstrated significantly higher ALP activity compared  
233 to unstimulated control cultures. The presence of peak ALP levels around day 14 is a marker for  
234 osteogenic differentiation [41] and, in our study, indicated osteogenic differentiation potential. This was  
235 supported by mineralization and bone-like nodule formation after 28 days of differentiation in both  
236 treatments.

237 Adipogenic differentiation potential was evaluated over the course of 14 days. As mature  
238 adipocytes predominantly consist of lipid droplets [42], we used positive Oil Red O staining to visualize  
239 the transition from MSCs into adipocytes. Morphological alterations from spindle-shaped MSCs toward  
240 round adipocytes were observed after 7 days in both hPL types. Similarly, lipid droplets had formed at  
241 the periphery of the cells by day 7, and after 14 days the lipid droplets took up most of the intracellular  
242 space.

243 Finally, we evaluated chondrogenic differentiation potential over a period of 35 days. Cell  
244 pellets from both hPL-PIPC-MSCs and hPL-PIPL-MSCs had accumulated significantly more  
245 glycosaminoglycans (GAGs) after 28 days of differentiation than unstimulated control cultures. This  
246 was consistent at day 35 for hPL-PIPC-MSCs, whereas the GAG concentration decreased between days  
247 28 and 35 for hPL-PIPL-MSCs. To evaluate changes within pellet structures, the pellets were sectioned  
248 and stained with Masson's trichrome. During differentiation, we observed lacunae formation and  
249 collagen fiber formation, which confirmed successful chondrogenic differentiation.

250 Based on the results obtained in this study, it appears that the application of pathogen  
251 inactivation techniques after platelet expiry may prove to be a valuable tool in the pursuit of optimal  
252 safety and standardization in therapeutic-grade human platelet lysate production.

253

## 254 **Conclusions**

255 In this study, we demonstrated that functional hPL can be produced by performing pathogen  
256 inactivation after platelet lysis of expired and previously untreated platelet concentrates (hPL-PIPL).  
257 hPL-PIPL successfully supported long-term cell proliferation and tri-lineage differentiation of BM-  
258 MSCs. While hPL-PIPL performed comparably to hPL-PIPC in terms of tri-lineage differentiation,  
259 lower cumulative population doublings (CPDs) were observed for hPL-PIPL. hPL-PIPL was also found  
260 to contain lower concentrations of key growth factors, suggesting that the timing of pathogen  
261 inactivation affects the mitogenic potential of hPL rather than differentiation potential.

262

263

## 264 **Materials and methods**

265

### 266 **Preparation of platelet lysates**

267 Four platelet concentrates (PCs) were prepared from a total of 32 buffy coats according to  
268 standard procedure at the Blood Bank, Landspítali (The National University Hospital of Iceland),  
269 Reykjavík, Iceland, as specified in Table 2. Two separate batches of PCs (batch nos. 23 and 24) were  
270 each prepared by pooling two buffy coat-derived PCs together. Each pooled batch represented 16 whole  
271 blood donations obtained from healthy donors of the Blood Bank. Each batch was further split into two  
272 units (and exposed to pathogen inactivation at different timepoints. The first unit, hPL-PIPC, was  
273 exposed to pathogen inactivation using the INTERCEPT™ Blood System (Cerus Corporation, Concord,  
274 CA, USA) less than 24 hours post donation, according to manufacturer's protocol. Following pathogen  
275 inactivation, the PCs were placed into a platelet agitator at  $22 \pm 2^\circ\text{C}$  for seven days until expiration, and

276 then stored at  $-80^{\circ}\text{C}$  for three weeks prior to platelet lysate production. The second unit, hPL-PIPL, was  
277 placed directly into the platelet agitator at  $22 \pm 2^{\circ}\text{C}$  without being pathogen inactivated, stored for seven  
278 days until expiration, and then transferred to  $-80^{\circ}\text{C}$  storage for three weeks. Pathogen inactivation for  
279 this second unit was performed after platelet lysis.

280

281

282 **Table 2. Platelet concentrate characteristics.**

| PC<br>No. | Number of buffy coats <sup>a</sup> |    |    | Mean platelet<br>count ( $\times 10^9$ ) | Batch<br>no. |
|-----------|------------------------------------|----|----|------------------------------------------|--------------|
|           | Total                              | O+ | O- |                                          |              |
| 1         | 8                                  | 7  | 1  | $278 \pm 88.6$                           | 23           |
| 2         | 8                                  | 4  | 4  | $211 \pm 50.5$                           | 23           |
| 3         | 8                                  | 8  | 0  | $197 \pm 40.2$                           | 24           |
| 4         | 8                                  | 5  | 3  | $195 \pm 25.4$                           | 24           |
| Total     | 32                                 | 24 | 8  | $220 \pm 34.1$                           |              |

283 <sup>a</sup> Four buffy coat-derived platelet concentrates (PC) from donors with either O RhD positive (O+) or O RhD  
284 negative (O-) blood groups comprised the starting material.

285

286

287 The expired PCs were collected and subjected to platelet lysis by three cycles of thawing at  $37^{\circ}\text{C}$   
288 and freezing at  $-80^{\circ}\text{C}$  to initiate degranulation. After the third cycle, the platelet lysates were aliquoted  
289 in 50-mL centrifugation tubes (Corning Science, Reynosa Tamaulipas, Mexico). Platelet fragments were  
290 removed by centrifugation at  $4975 \times g$  for 20 minutes using a Heraeus Multifuge X3 (Thermo Scientific,  
291 Waltham, Massachusetts, USA). This centrifugation step was repeated after the supernatants (platelet  
292 lysates) from each tube were transferred to new 50-mL centrifugation tubes. Prepared lysates from each  
293 unit were pooled. The hPL-PIPC units were distributed into 45 mL aliquots and stored at  $-20^{\circ}\text{C}$  in a  
294 freezer (Gram BioLine, Vojens, Denmark). In addition, 1 mL and 5 mL aliquots were prepared for  
295 composition analysis and adipogenic differentiation, respectively, and stored at  $-20^{\circ}\text{C}$  prior to analysis.  
296 The hPL-PIPL units were injected into sterile bags (Cerus Corporation, Concord, CA, USA) and

297 exposed to pathogen inactivation with the INTERCEPT™ Blood System, according to the  
298 manufacturer's protocol, before being aliquoted and stored at -20°C as above.

299 These undiluted platelet lysates were used for experimentation within 18 months of storage.

300

## 301 **Growth factor and cytokine quantification**

302 The undiluted platelet lysates were analyzed using Luminex xMAP Technology (EMD Millipore  
303 Corporation, Billerica, MA, USA) to quantify 37 soluble growth factors and cytokines. The Human  
304 Cytokine/Chemokine Magnetic Bead Panel (HCYTOMAG-60K, Millipore) was used; it applies  
305 microspheres and fluorescent signaling to quantify EGF, Eotaxin, FGF-2, Fractalkine, G-CSF, GM-  
306 CSF, IFN $\alpha$ 2, IFN $\gamma$ , IL-1 $\alpha$ , IL-1 $\beta$ , IL-2, IL-3, IL-4, IL-5, IL-6, IL-7, IL-8, IL-9, IL-10, IL-12P40, IL-  
307 12P70, IL-13, IL-15, IL-17A, IL-1RA, IP-10, MCP-1, MCP-3, MDC, MIP-1 $\alpha$ , MIP-1 $\beta$ , PDGF-AA,  
308 PDGF-AB/BB, TGF- $\alpha$ , TNF $\alpha$ , TNF $\beta$ , and VEGF. The concentrations in hPL-PIPL were compared to  
309 those in hPL-PIPC and expressed as percentage difference in relation to hPL-PIPC (Equation 1, where  
310  $[GF/C]_{hPL-PIPC}$  refers to the concentration of a particular growth factor or cytokine in the hPL-PIPC or  
311 hPL-PIPL treatment).

312

$$\% \text{ Difference} = \frac{[GF/C]_{hPL-PIPC} - [GF/C]_{hPL-PIPL}}{[GF/C]_{hPL-PIPC}} \cdot 100\% \quad (1)$$

313

## 314 **Cell culturing**

315 Mesenchymal stromal cells originating from the bone marrow of two healthy human donors were  
316 purchased from Lonza (Walkersville, MD, USA) and stored at -180°C in liquid nitrogen prior to  
317 experimentation. The cells tested negative for viral infections and mycoplasma. Prior to  
318 experimentation, the MSCs were cultured in a cell culture medium supplemented with hPL-PIPC  
319 through passage 3. Subsequently, the MSCs were distributed into two cell culture flasks supplemented  
320 with either hPL-PIPC or hPL-PIPL at the time of cell split (between passage 3 and passage 4). MSCs in  
321 passage 5 were used for experimentation.



322 The culture medium used was a complete cell culture medium (referred to as “expansion medium”  
323 in this study) consisting of Dulbecco’s Modified Eagle Medium (DMEM) / F12 + Glutamax supplement  
324 (Gibco, Grand Island, NY, USA) with 1% penicillin/streptomycin (Gibco) and 2 IU/mL heparin (Leo  
325 Pharma A/S, Ballerup, Denmark), supplemented with a sufficient amount of either hPL-PIPC (to  
326 produce hPL-PIPC-MSCs) or hPL-PIPL (to produce hPL-PIPL-MSCs) to achieve a final concentration  
327 of 9%. Specifically, after allowing solutions to reach ambient temperature, 50 mL of platelet lysate was  
328 centrifuged at  $4975 \times g$  for 10 minutes and added to 500 mL DMEM / F12 + Glutamax along with 5 mL  
329 of penicillin/streptomycin and 200  $\mu$ L heparin. The medium was allowed to sit for 10 minutes prior to  
330 sterile filtration. Sterile filtration was performed using a 0.45  $\mu$ m low protein-binding funnel (Corning  
331 Incorporated, NY, USA) in a closed system. Finally, the medium was aliquoted into 45-mL  
332 centrifugation tubes (Corning Incorporated) and stored at  $-20^{\circ}\text{C}$  until use. Once thawed for use in cell  
333 cultures, the medium was maintained at  $4^{\circ}\text{C}$  in a laboratory refrigerator (Angelantoni Life Sciences,  
334 Massa Martana, Italy) for a maximum of seven days.

335 Incubation was done in a Steri-Cult CO<sub>2</sub> Incubator, HEPA Class 100 (Thermo Scientific) under  
336 the following conditions:  $37^{\circ}\text{C}$ ; 5% CO<sub>2</sub>, and 95% humidity.

337 Cell expansion was performed in different vessels appropriately selected for each experiment at  
338 a seeding density of 6000 cells/cm<sup>2</sup>. For the initial cell expansion prior to experimentation, MSCs were  
339 expanded in 20 mL of expansion medium in Nunc™ EasYFlask™ 75 cm<sup>2</sup> (T75) cell culture flasks  
340 (Thermo Fischer Scientific Nunc A/S, Roskilde, Denmark). For long-term proliferation studies, MSCs  
341 were expanded in 5 mL of expansion medium in Nunc™ EasYFlask™ 25 cm<sup>2</sup> (T25) cell culture flasks  
342 (Thermo Fischer Scientific Nunc A/S). In both cases, the expansion medium was replaced every two to  
343 three days.

344 Cell passaging was performed upon reaching 80-90% confluency, as determined visually by daily  
345 inspection using a Leica DM IRB inverted contrast microscope (Leica Microsystems, Wetzlar,  
346 Germany). In brief, the MSCs were gently washed with 1X PBS (Gibco) and dissociated from the  
347 surface in 0.25% 1X Trypsin-EDTA (Gibco) for 5 minutes. Preheated expansion medium was added to  
348 neutralize the trypsin-EDTA before the cells were centrifuged at  $609 \times g$  for 5 minutes. After

349 centrifugation, the supernatant was discarded and the pellet was carefully resuspended in 1 mL preheated  
350 medium prior to cell counting. The cells were diluted 5X by mixing 20  $\mu$ L resuspended cells, 30  $\mu$ L 1X  
351 PBS, and 50  $\mu$ L 0.4% trypan blue stain (Gibco) in a 1.5-mL micro tube (SARSTEDT AG & Co.,  
352 Nümbrecht, Germany). The cell solution was loaded onto a hemocytometer (BRAND GMBH + CO  
353 KG, Wertheim, Germany), covered by a glass, and counted at 50X magnification. Viable MSCs were  
354 identified by the retention of their round morphology and by their lack of trypan blue uptake. Viable  
355 MSCs located in the four corner squares were counted twice using the upper and lower chambers and  
356 averaged to estimate the number of cells. If the sum of the four corner squares in a single chamber  
357 exceeded 200 viable MSCs, the cell solution was diluted further and the cell count repeated. Cell  
358 passaging was completed by seeding 6000 cells/cm<sup>2</sup> into a new cell culture vessel.

359 Long-term proliferation was evaluated by expanding and passaging MSCs in T25 cell culture  
360 flasks. Initially, MSCs entering passage 5 were seeded into six T25 cell culture flasks and expanded in  
361 cell culture media supplemented with either hPL-PIPC or hPL-PIPL. The expansion medium was  
362 replaced every two to three days, and cell passaging was carried out upon reaching 80-90% confluency.  
363 All cell culture flasks were passaged on the same day and the number of population doublings (PDs)  
364 was determined using Equation 2, where N<sub>0</sub> and N<sub>1</sub> represent the number of cells seeded and cells  
365 harvested, respectively.

366

$$PDs = \frac{\log_{10}(N_0) - \log_{10}(N_1)}{\log_{10}(2)} \quad (2)$$

367

368 Cumulative population doublings (CPDs) were expressed as the sum of the PDs obtained in each  
369 passage. Cell expansion was terminated upon achieving recovery rates of less than 100% of the seeded  
370 cell number after a maximum of 14 days in culture. Daily monitoring was performed to assess  
371 morphological alterations.

372

### 373 **Tri-lineage differentiation**

374 MSCs in passage 5 were used to evaluate *in vitro* tri-lineage differentiation potential. Osteogenic  
375 and adipogenic differentiation were performed simultaneously using the same cell cultures.  
376 Chondrogenic differentiation was performed separately due to the large number of required cells.

377

## 378 **Osteogenic differentiation**

379 Osteogenic differentiation was evaluated at various timepoints during 28 days of stimulation in  
380 osteogenic medium. The osteogenic medium consisted of 45 mL DMEM / F12 + Glutamax (Gibco)  
381 supplemented with 5 mL platelet lysate, 50  $\mu$ L dexamethasone (Sigma-Aldrich, St. Louis, MO, USA),  
382 50  $\mu$ L human/murine/rat BMP-2 (Peprotech, Rocky Hill, NJ, USA), 50  $\mu$ L L-ascorbic acid (Sigma-  
383 Aldrich), and 108 mg  $\beta$ -glycerophosphate disodium salt hydrate (Sigma-Aldrich). An increase in  
384 alkaline phosphatase activity and positive staining for mineralization were used as markers. In brief,  
385 3500 cells/cm<sup>2</sup> were seeded in quadruplicate in 6-well tissue culture plates (Corning Incorporated) and  
386 in triplicate in 12-well tissue culture plates (Corning Incorporated) for each timepoint. Control plates  
387 were included by seeding 5500 cells/cm<sup>2</sup> in expansion media in absence of osteogenic stimulation. Plates  
388 were incubated at 37°C, 5% CO<sub>2</sub>, and 95% humidity for up to 28 days. The cell culture medium was  
389 replaced every two to three days. The left half of the 12-well plates was used to quantify ALP activity,  
390 while the right half was used to detect mineralization by staining with Alizarin Red S.

391 Enzymatic activity of ALP was evaluated after 7, 14, 21, and 28 days of osteogenic differentiation.  
392 Briefly, 0.02% Triton-X (Sigma-Aldrich) diluted in 1X PBS was added to all samples, and then the cells  
393 were scraped off the surface and transferred to a 1.5-mL micro tube. The cells were vortexed and then  
394 centrifuged at 13,200  $\times$  g for 15 minutes at 4°C. After centrifugation, the supernatant was transferred to  
395 a new micro tube and mixed with 500  $\mu$ L of p-nitrophenyl phosphate (pNPP) solution, prepared using  
396 SIGMAFAST™ pNPP and SIGMAFAST™ Tris Buffer (Sigma-Aldrich). Next, the solution was  
397 incubated for 45 minutes at 37°C protected from light, and the absorbance was measured at 400 nm.  
398 Each sample reading was corrected by the average absorbance of three blank replicates. ALP activity  
399 (nmol (p-nitrophenol)/min) was calculated using Equation 3,

400

401

$$activity = \frac{OD/18.8}{t} \cdot 1000, \quad (3)$$

402

403 where OD refers to the optical density obtained at 400 nm (-), 18.8 is the extinction coefficient of p-  
404 nitrophenol ( $\mu\text{mol}^{-1}$ ), t is time (min), and 1000 is used to convert  $\mu\text{mol}$  to nmol.

405 Alizarin Red S staining was performed to visualize mineralization during osteogenic  
406 differentiation. Cell cultures were collected and fixed in 4% paraformaldehyde after 7, 14, 21, and 28  
407 days of osteogenic differentiation and stored at 4°C prior to staining. Cells were washed three times with  
408 distilled water (dH<sub>2</sub>O) before adding a 2% Alizarin Red solution containing Alizarin Red S dye (Sigma-  
409 Aldrich) diluted in dH<sub>2</sub>O. The cells were placed on a rotating shaker and stained for 20 minutes at room  
410 temperature, followed by four washing steps using dH<sub>2</sub>O. The dye was allowed to dry for 24 hours by  
411 inverting the plates on paper towels. The following day, images were captured using inverted contrast  
412 microscope imaging, and alterations in morphology and formation of bone-like nodules were evaluated.

413

## 414 **Adipogenic differentiation**

415 Adipogenic differentiation was evaluated after 7 and 14 days of stimulation in adipogenic  
416 medium. Adipogenic medium consisted of 22.5 mL StemPro® Adipocyte Differentiation Basal Medium  
417 (Gibco), 2.5 mL StemPro® Adipogenesis Supplement (Gibco), 0.25 mL penicillin/streptomycin, 2.5  
418 mL platelet lysate, and 20  $\mu\text{L}$  heparin.

419 In brief, 10,000 cells/cm<sup>2</sup> were seeded in triplicate Nunc™ 9 cm<sup>2</sup> Slideflasks (Thermo Fischer  
420 Scientific Nunc A/S). Control slideflasks were included by seeding 5500 cells/cm<sup>2</sup> in expansion media  
421 in absence of adipogenic stimulation. Slideflasks were incubated at 37°C, 5% CO<sub>2</sub>, and 95% humidity  
422 for up to 14 days. The MSCs were allowed to reach a confluency of 50-70% in expansion media prior  
423 to introduction of the adipogenic medium. The cell culture medium was replaced every two to three  
424 days. Cultures in the 9 cm<sup>2</sup> slideflasks were washed three times in 1X PBS and fixed in 3 mL of 4%  
425 paraformaldehyde and stored at 4 °C after 7 or 14 days prior to Oil Red O staining.

426 Upon termination of the experiment, the slideflasks were collected and sent to the Department of  
427 Pathology (Landspítali, Háskólasjúkrahús, Reykjavík, Iceland) where Oil Red O staining was performed  
428 according to departmental protocols. Positive Oil Red O-stained lipid droplets were used as markers of  
429 adipogenic differentiation.

430

## 431 **Chondrogenic differentiation**

432 Chondrogenic differentiation was evaluated after 14, 28, and 35 days of stimulation in  
433 chondrogenic medium. Chondrogenic medium consisted of 47.9 mL DMEM / F12 + Glutamax  
434 supplemented with 9% hPL, 1% penicillin/streptomycin, 50  $\mu$ L L-ascorbic acid, 50  $\mu$ L dexamethasone,  
435 500  $\mu$ L sodium pyruvate (Sigma-Aldrich), 500  $\mu$ L L-proline (Sigma-Aldrich), 500  $\mu$ L ITS+ (Gibco) and  
436 5  $\mu$ L of 10 ng/ $\mu$ L TGF- $\beta$ 3. Production of glycosaminoglycans, as well as positive collagen fibers and  
437 lacunae formation visualized by chondrocytic pellet staining with Masson's trichrome were used as  
438 markers of chondrogenic differentiation.

439 In brief, 250,000 cells were seeded in ten 1.5-mL micro tubes containing 0.5 mL chondrogenic  
440 media for each timepoint. Control micro tubes were included by seeding 250,000 cells in expansion  
441 media in absence of chondrogenic stimulation. Pellets were formed by centrifugation at  $152 \times g$  using a  
442 Sorvall Instruments RC5C centrifuge (Thermo Fischer Scientific). The caps were punctured with a  
443 sterile needle to allow air exchange, and the tubes were incubated at 37°C, 5% CO<sub>2</sub>, and 95% humidity  
444 for up to 35 days. After 18-24 hours, the tubes were gently agitated to detach the pellets from the wall  
445 of the micro tubes. To minimize the stress on the pellets, half of the cell culture medium was replaced  
446 every second day. At each sampling timepoint (14, 28, and 35 days), three pellets were analyzed for  
447 GAG content and two pellets were prepared for histological staining.

448 To prepare pellets for the GAG assay, the three pellets were pooled into a micro tube containing  
449 500  $\mu$ L papain extraction reagent (Sigma-Aldrich). The samples were then transferred to a Grant-Bio  
450 PHMT heating block (Grant Instruments Ltd, Shepreth, Cambridgeshire, UK) and fully digested at 65°C  
451 for a maximum of seven hours. After digestion, the samples were centrifuged at  $9660 \times g$  and the  
452 supernatants were transferred to new micro tubes and stored at -80°C.

453 To prepare pellets for histological staining, the pellets were collected and washed in 1X PBS prior  
454 to fixation in 0.5 mL 4% paraformaldehyde in new micro tubes. The samples were stored at 4°C prior  
455 to histological staining.

456 The Biocolor Blyscan Sulfated Glycosaminoglycan Assay B1000 (Biocolor Ltd, County Antrim,  
457 United Kingdom) was used to quantify the concentrations of GAGs. The assay was performed according  
458 to the manufacturer's protocol. In brief, standards diluted in papain extraction reagent were prepared  
459 containing GAGs in the working range of 0-5 µg/mL. 1 mL of Blyscan dye reagent was added to a new  
460 micro tube prepared for each standard and sample. 100 µL of each standard and sample was then added  
461 to the new micro tubes and mixed with the Blyscan dye reagent for 30 minutes on a mechanical shaker  
462 (Heidolph, Schwabach, Germany). After incubation, the micro tubes were centrifuged for 10 minutes at  
463  $9660 \times g$ . The supernatant was separated from the pellet by inverting the micro tubes carefully before  
464 adding 0.5 mL dissociation reagent. Prior to quantification, the micro tubes were vortexed to release  
465 bound dye into the solution. 200 µL of each standard and sample was loaded into a 96-well tissue culture  
466 plate in triplicate and measured at 656 nm using a Multiskan® spectrum spectrophotometer (Thermo  
467 Scientific, Vantaa, Finland). The average absorbance of the blank replicates was subtracted from each  
468 standard and sample. The GAG concentration of each sample was determined using the standard curve.  
469 To express GAG concentration per pellet, the values were divided by three to account for the number of  
470 pooled pellets.

471 Upon experimental termination, the micro tubes were collected and sent to the Department of  
472 Pathology (Landspítali, Háskólasjúkrahús, Reykjavík, Iceland). Masson's trichrome and hematoxylin  
473 and eosin staining were performed according to departmental protocols.

474

## 475 **Statistical analysis**

476 Statistical comparisons were performed using GraphPad Prism Version 7.04 software (GraphPad  
477 Software, Inc., San Diego, CA, USA). Paired t-tests were performed to analyze differences in total  
478 protein. Ratio paired t-tests were performed to analyze differences in the content of growth factors and  
479 cytokines. Differences in proliferation and differentiation were analyzed using a two-way ANOVA

480 followed by multiple comparisons using Tukey's post hoc test. Differences were considered significant  
481 at  $p < 0.05$ .

482 The sample size (N) for each experiment refers to the number of experimental units derived from  
483 biological units using separate cell culture vessels. Nomenclature and principle were adapted from Lazic  
484 et al. [43].

485

## 486 **Acknowledgements**

487 We would like to thank Ragna Landrö for processing the platelet concentrates and Sigrún Bærings  
488 Kristjánsdóttir for support with staining procedures.

## 490 **References**

- 491 1. Allain JP, Bianco C, Blajchman MA, Brecher ME, Busch M, Leiby D, et al. Protecting the blood  
492 supply from emerging pathogens: the role of pathogen inactivation. *Transfus Med Rev.*  
493 2005;19(2):110–26.
- 494 2. Drew VJ, Barro L, Seghatchian J, Burnouf T. Towards pathogen inactivation of red blood cells and  
495 whole blood targeting viral DNA/RNA: design, technologies, and future prospects for developing  
496 countries. *Blood Transfus.* 2017;15(6):512–21.
- 497 3. Irsch J, Lin L. Pathogen inactivation of platelet and plasma blood components for transfusion using  
498 the INTERCEPT Blood System™. *Transfus Med Hemother.* 2011;38(1):19–31.
- 499 4. Green L, Allard S, Cardigan R. Modern banking, collection, compatibility testing and storage of  
500 blood and blood components. *Anaesthesia.* 2015;70(Suppl 1):3-9,e2.
- 501 5. Bakkour S, Chafets DM, Wen L, Dupuis K, Castro G, Green JM, et al. Assessment of nucleic acid  
502 modification induced by amotosalen and ultraviolet A light treatment of platelets and plasma using  
503 real-time polymerase chain reaction amplification of variable length fragments of mitochondrial  
504 DNA. *Transfusion.* 2016;56(2):410–20.
- 505 6. Ellingson KD, Sapiano MRP, Haass KA, Savinkina AA, Baker ML, Chung KW, et al. Continued  
506 decline in blood collection and transfusion in the United States–2015. *Transfusion.* 2017;57(Suppl  
507 2):1588–98.
- 508 7. Guan L, Tian X, Gombar S, Zemek AJ, Krishnan G, Scott R, et al. Big data modeling to predict  
509 platelet usage and minimize wastage in a tertiary care system. *Proc Natl Acad Sci U S A.*  
510 2017;114(43):11368–73.
- 511 8. Jonsdottir-Buch SM, Lieder R, Sigurjonsson OE. Platelet lysates produced from expired platelet  
512 concentrates support growth and osteogenic differentiation of mesenchymal stem cells. *PLoS ONE.*  
513 2013;8(7):e68984.
- 514 9. Caplan AI. Adult mesenchymal stem cells for tissue engineering versus regenerative medicine. *J*  
515 *Cell Physiol.* 2007;213(2):341–7.



- 516 10. Friedenstein AJ, Petrakova KV, Kurolesova AI, Frolova GP. Heterotopic of bone marrow. Analysis  
517 of precursor cells for osteogenic and hematopoietic tissues. *Transplantation*. 1968;6(2):230–47.
- 518 11. Bara JJ, Richards RG, Alini M, Stoddart MJ. Concise review: Bone marrow-derived mesenchymal  
519 stem cells change phenotype following in vitro culture: implications for basic research and the  
520 clinic. *Stem Cells*. 2014;32(7):1713–23.
- 521 12. Abdi R, Fiorina P, Adra CN, Atkinson M, Sayegh MH. Immunomodulation by mesenchymal stem  
522 cells. *Diabetes*. 2008;57(7):1759–67.
- 523 13. Wang L, Zhu C, Ma D, Gu Z, Xu C, Wang F, et al. Efficacy and safety of mesenchymal stromal  
524 cells for the prophylaxis of chronic graft-versus-host disease after allogeneic hematopoietic stem  
525 cell transplantation: a meta-analysis of randomized controlled trials. *Ann Hematol*.  
526 2018;97(10):1941–50.
- 527 14. Phinney DG. Biochemical heterogeneity of mesenchymal stem cell populations: clues to their  
528 therapeutic efficacy. *Cell Cycle*. 2007;6(23):2884–9.
- 529 15. Squillaro T, Peluso G, Galderisi U. Clinical trials with mesenchymal stem cells: an update. *Cell*  
530 *Transplant*. 2016 May 1;25(5):829–48.
- 531 16. van der Valk J, Bieback K, Buta C, Cochrane B, Dirks WG, Fu J, et al. Fetal bovine serum (FBS):  
532 past - present - future. *ALTEX*. 2018;35(1):99-118.
- 533 17. Gstraunthaler G. Alternatives to the use of fetal bovine serum: serum-free cell culture. *ALTEX*.  
534 2003;20(4):275–81.
- 535 18. van der Valk J, Mellor D, Brands R, Fischer R, Gruber F, Gstraunthaler G, et al. The humane  
536 collection of fetal bovine serum and possibilities for serum-free cell and tissue culture. *Toxicol In*  
537 *Vitro*. 2004;18(1):1–12.
- 538 19. Flemming A, Schallmoser K, Strunk D, Stolk M, Volk H-D, Seifert M. Immunomodulative efficacy  
539 of bone marrow-derived mesenchymal stem cells cultured in human platelet lysate. *J Clin Immunol*.  
540 2011;31(6):1143–56.
- 541 20. Bieback K. Platelet lysate as replacement for fetal bovine serum in mesenchymal stromal cell  
542 cultures. *Transfus Med Hemother*. 2013;40(5):326–35.

- 543 21. Burnouf T, Strunk D, Koh MBC, Schallmoser K. Human platelet lysate: replacing fetal bovine  
544 serum as a gold standard for human cell propagation? *Biomaterials*. 2016;76(Suppl C):371–87.
- 545 22. Jonsdottir-Buch SM, Sigurgrimsdottir H, Lieder R, Sigurjonsson OE. Expired and pathogen-  
546 inactivated platelet concentrates support differentiation and immunomodulation of mesenchymal  
547 stromal cells in culture. *Cell Transplant*. 2015;24(8):1545–54.
- 548 23. Astori G, Amati E, Bambi F, Bernardi M, Chieragato K, Schäfer R, et al. Platelet lysate as a  
549 substitute for animal serum for the ex-vivo expansion of mesenchymal stem/stromal cells: present  
550 and future. *Stem Cell Res Ther*. 2016;7(1):93.
- 551 24. Doucet C, Ernou I, Zhang Y, Llense J-R, Begot L, Holy X, et al. Platelet lysates promote  
552 mesenchymal stem cell expansion: a safety substitute for animal serum in cell-based therapy  
553 applications. *J Cell Physiol*. 2005;205(2):228–36.
- 554 25. Copland IB, Garcia MA, Waller EK, Roback JD, Galipeau J. The effect of platelet lysate fibrinogen  
555 on the functionality of MSCs in immunotherapy. *Biomaterials*. 2013;34(32):7840–50.
- 556 26. Bernardi M, Albiero E, Alghisi A, Chieragato K, Lievore C, Madeo D, et al. Production of human  
557 platelet lysate by use of ultrasound for ex vivo expansion of human bone marrow–derived  
558 mesenchymal stromal cells. *Cytotherapy*. 2013;15(8):920–9.
- 559 27. Shih DT-B, Burnouf T. Preparation, quality criteria, and properties of human blood platelet lysate  
560 supplements for ex vivo stem cell expansion. *N Biotechnol*. 2015;32(1):199–211.
- 561 28. Rauch C, Feifel E, Amann EM, Spötl HP, Schennach H, Pfaller W, et al. Alternatives to the use of  
562 fetal bovine serum: human platelet lysates as a serum substitute in cell culture media. *ALTEX*.  
563 2011;28(4):305–16.
- 564 29. Strunk D, Lozano M, Marks DC, Loh YS, Gstraunthaler G, Schennach H, et al. International forum  
565 on GMP-grade human platelet lysate for cell propagation: summary. *Vox Sang*. 2018;113(1):80-7.
- 566 30. Viau S, Lagrange A, Eap S, Chabrand L, Lorant J, Charrier M, et al. A standardized and  
567 characterized clinical grade human platelet lysate for efficient expansion of human bone marrow  
568 mesenchymal stem cells. *Cytotherapy*. 2018;20(5, Supplement):S54.

- 569 31. Chou ML, Burnouf T. Current methods to manufacture human platelet lysates for cell therapy and  
570 tissue engineering: possible trends in product safety and standardization. *ISBT Sci Ser.*  
571 2017;12(1):168–75.
- 572 32. Pietersz RNI, Reesink HW, Panzer S, Oknaian S, Kuperman S, Gabriel C, et al. Bacterial  
573 contamination in platelet concentrates. *Vox Sang.* 2014;106(3):256–83.
- 574 33. Ng F, Boucher S, Koh S, Sastry KSR, Chase L, Lakshmi U, et al. PDGF, TGF- $\beta$ , and FGF  
575 signaling is important for differentiation and growth of mesenchymal stem cells (MSCs):  
576 transcriptional profiling can identify markers and signaling pathways important in differentiation of  
577 MSCs into adipogenic, chondrogenic, and osteogenic lineages. *Blood.* 2008;112(2):295–307.
- 578 34. Lykov AP, Bondarenko NA, Surovtseva MA, Kim II, Poveshchenko OV, Pokushalov EA, et al.  
579 Comparative effects of platelet-rich plasma, platelet lysate, and fetal calf serum on mesenchymal  
580 stem cells. *Bull Exp Biol Med.* 2017;163(6):757–60.
- 581 35. Viau S, Chabrand L, Eap S, Lorant J, Rouger K, Goudaliez F, et al. Pathogen reduction through  
582 additive-free short-wave UV light irradiation retains the optimal efficacy of human platelet lysate  
583 for the expansion of human bone marrow mesenchymal stem cells. *PLoS ONE.*  
584 2017;12(8):e0181406.
- 585 36. Prudent M, D'Alessandro A, Cazenave JP, Devine DV, Gachet C, Greinacher A, et al. Proteome  
586 changes in platelets after pathogen inactivation—an interlaboratory consensus. *Transfus Med Rev.*  
587 2014;28(2):72–83.
- 588 37. Schubert P, Johnson L, Marks DC, Devine DV. Ultraviolet-based pathogen inactivation systems:  
589 untangling the molecular targets activated in platelets. *Front Med.* 2018;5:129.
- 590 38. Kerwin BA, Remmele RL. Protect from light: photodegradation and protein biologics. *J Pharm Sci.*  
591 2007;96(6):1468–79.
- 592 39. Zhang W, Liu HT. MAPK signal pathways in the regulation of cell proliferation in mammalian  
593 cells. *Cell Res.* 2002;12(1):9–18.
- 594 40. Wang S, Qu X, Zhao RC. Clinical applications of mesenchymal stem cells. *J Hematol Oncol.*  
595 2012;5:19.

- 596 41. Birmingham E, Niebur GL, McHugh PE, Shaw G, Barry FP, McNamara LM. Osteogenic  
597 differentiation of mesenchymal stem cells is regulated by osteocyte and osteoblast cells in a  
598 simplified bone niche. *Eur Cell Mater.* 2012;23:13–27.
- 599 42. Lowe CE, O’Rahilly S, Rochford JJ. Adipogenesis at a glance. *J Cell Sci.* 2011;124(16):2681–6.
- 600 43. Lazic SE, Clarke-Williams CJ, Munafò MR. What exactly is ‘N’ in cell culture and animal  
601 experiments? *PLoS Biol.* 2018;16(4):e2005282.
- 602

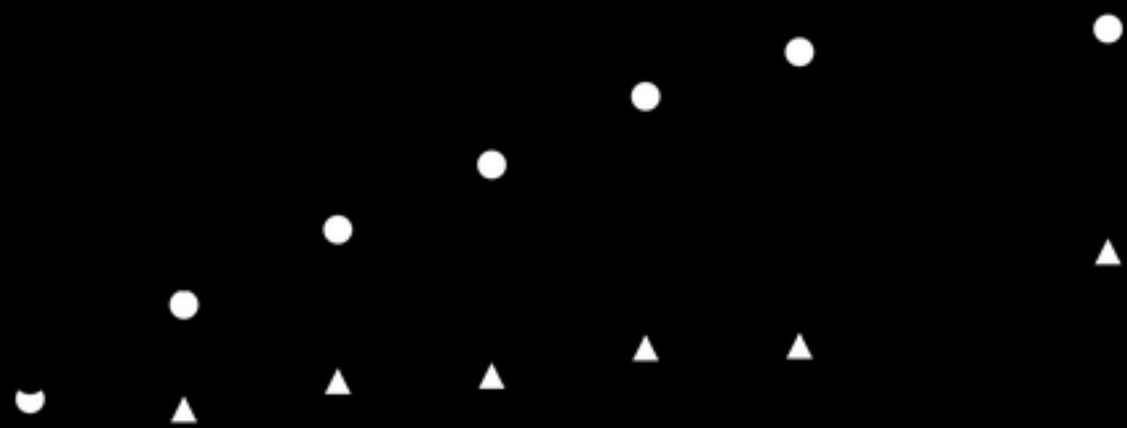

Figure 1

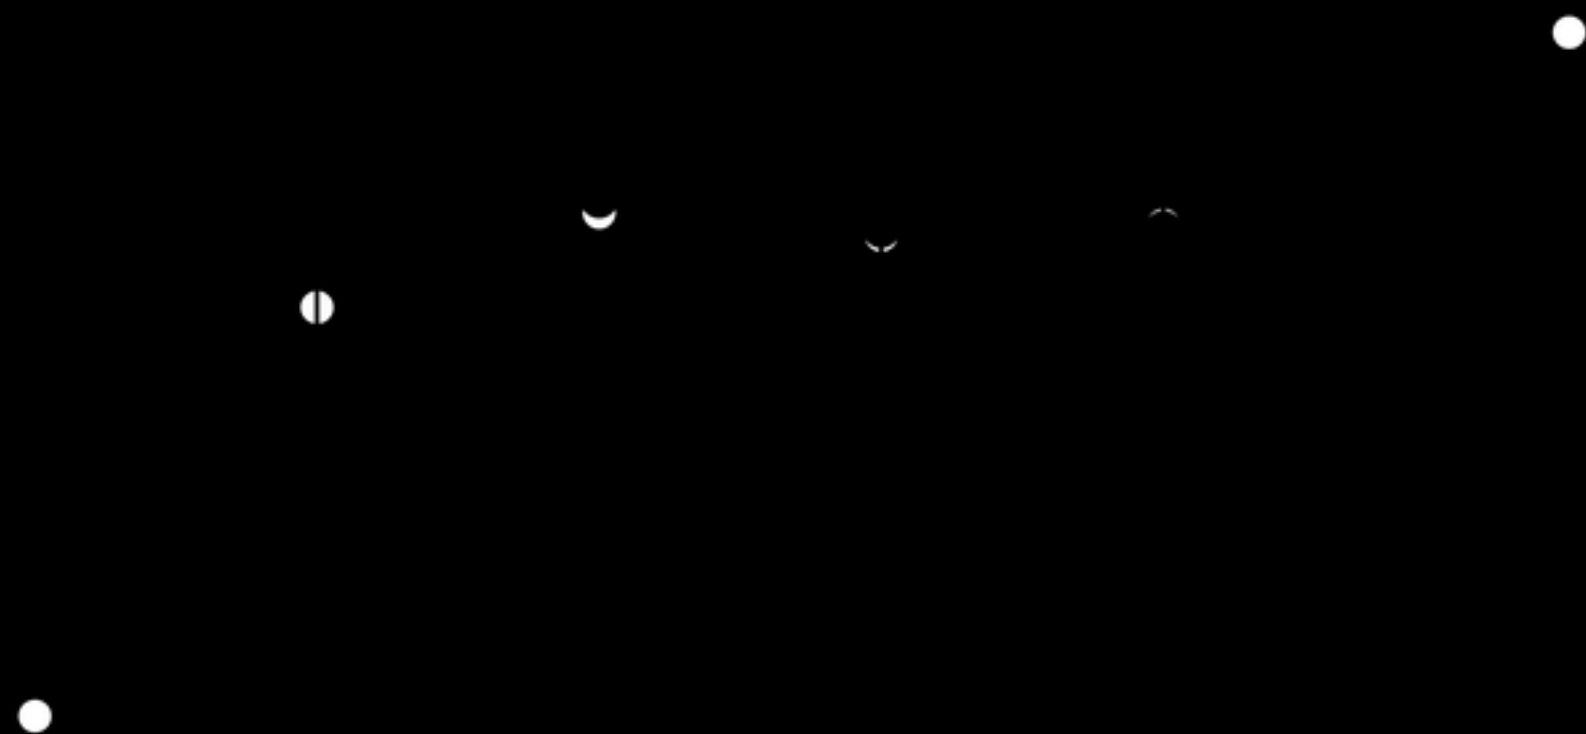

Figure2



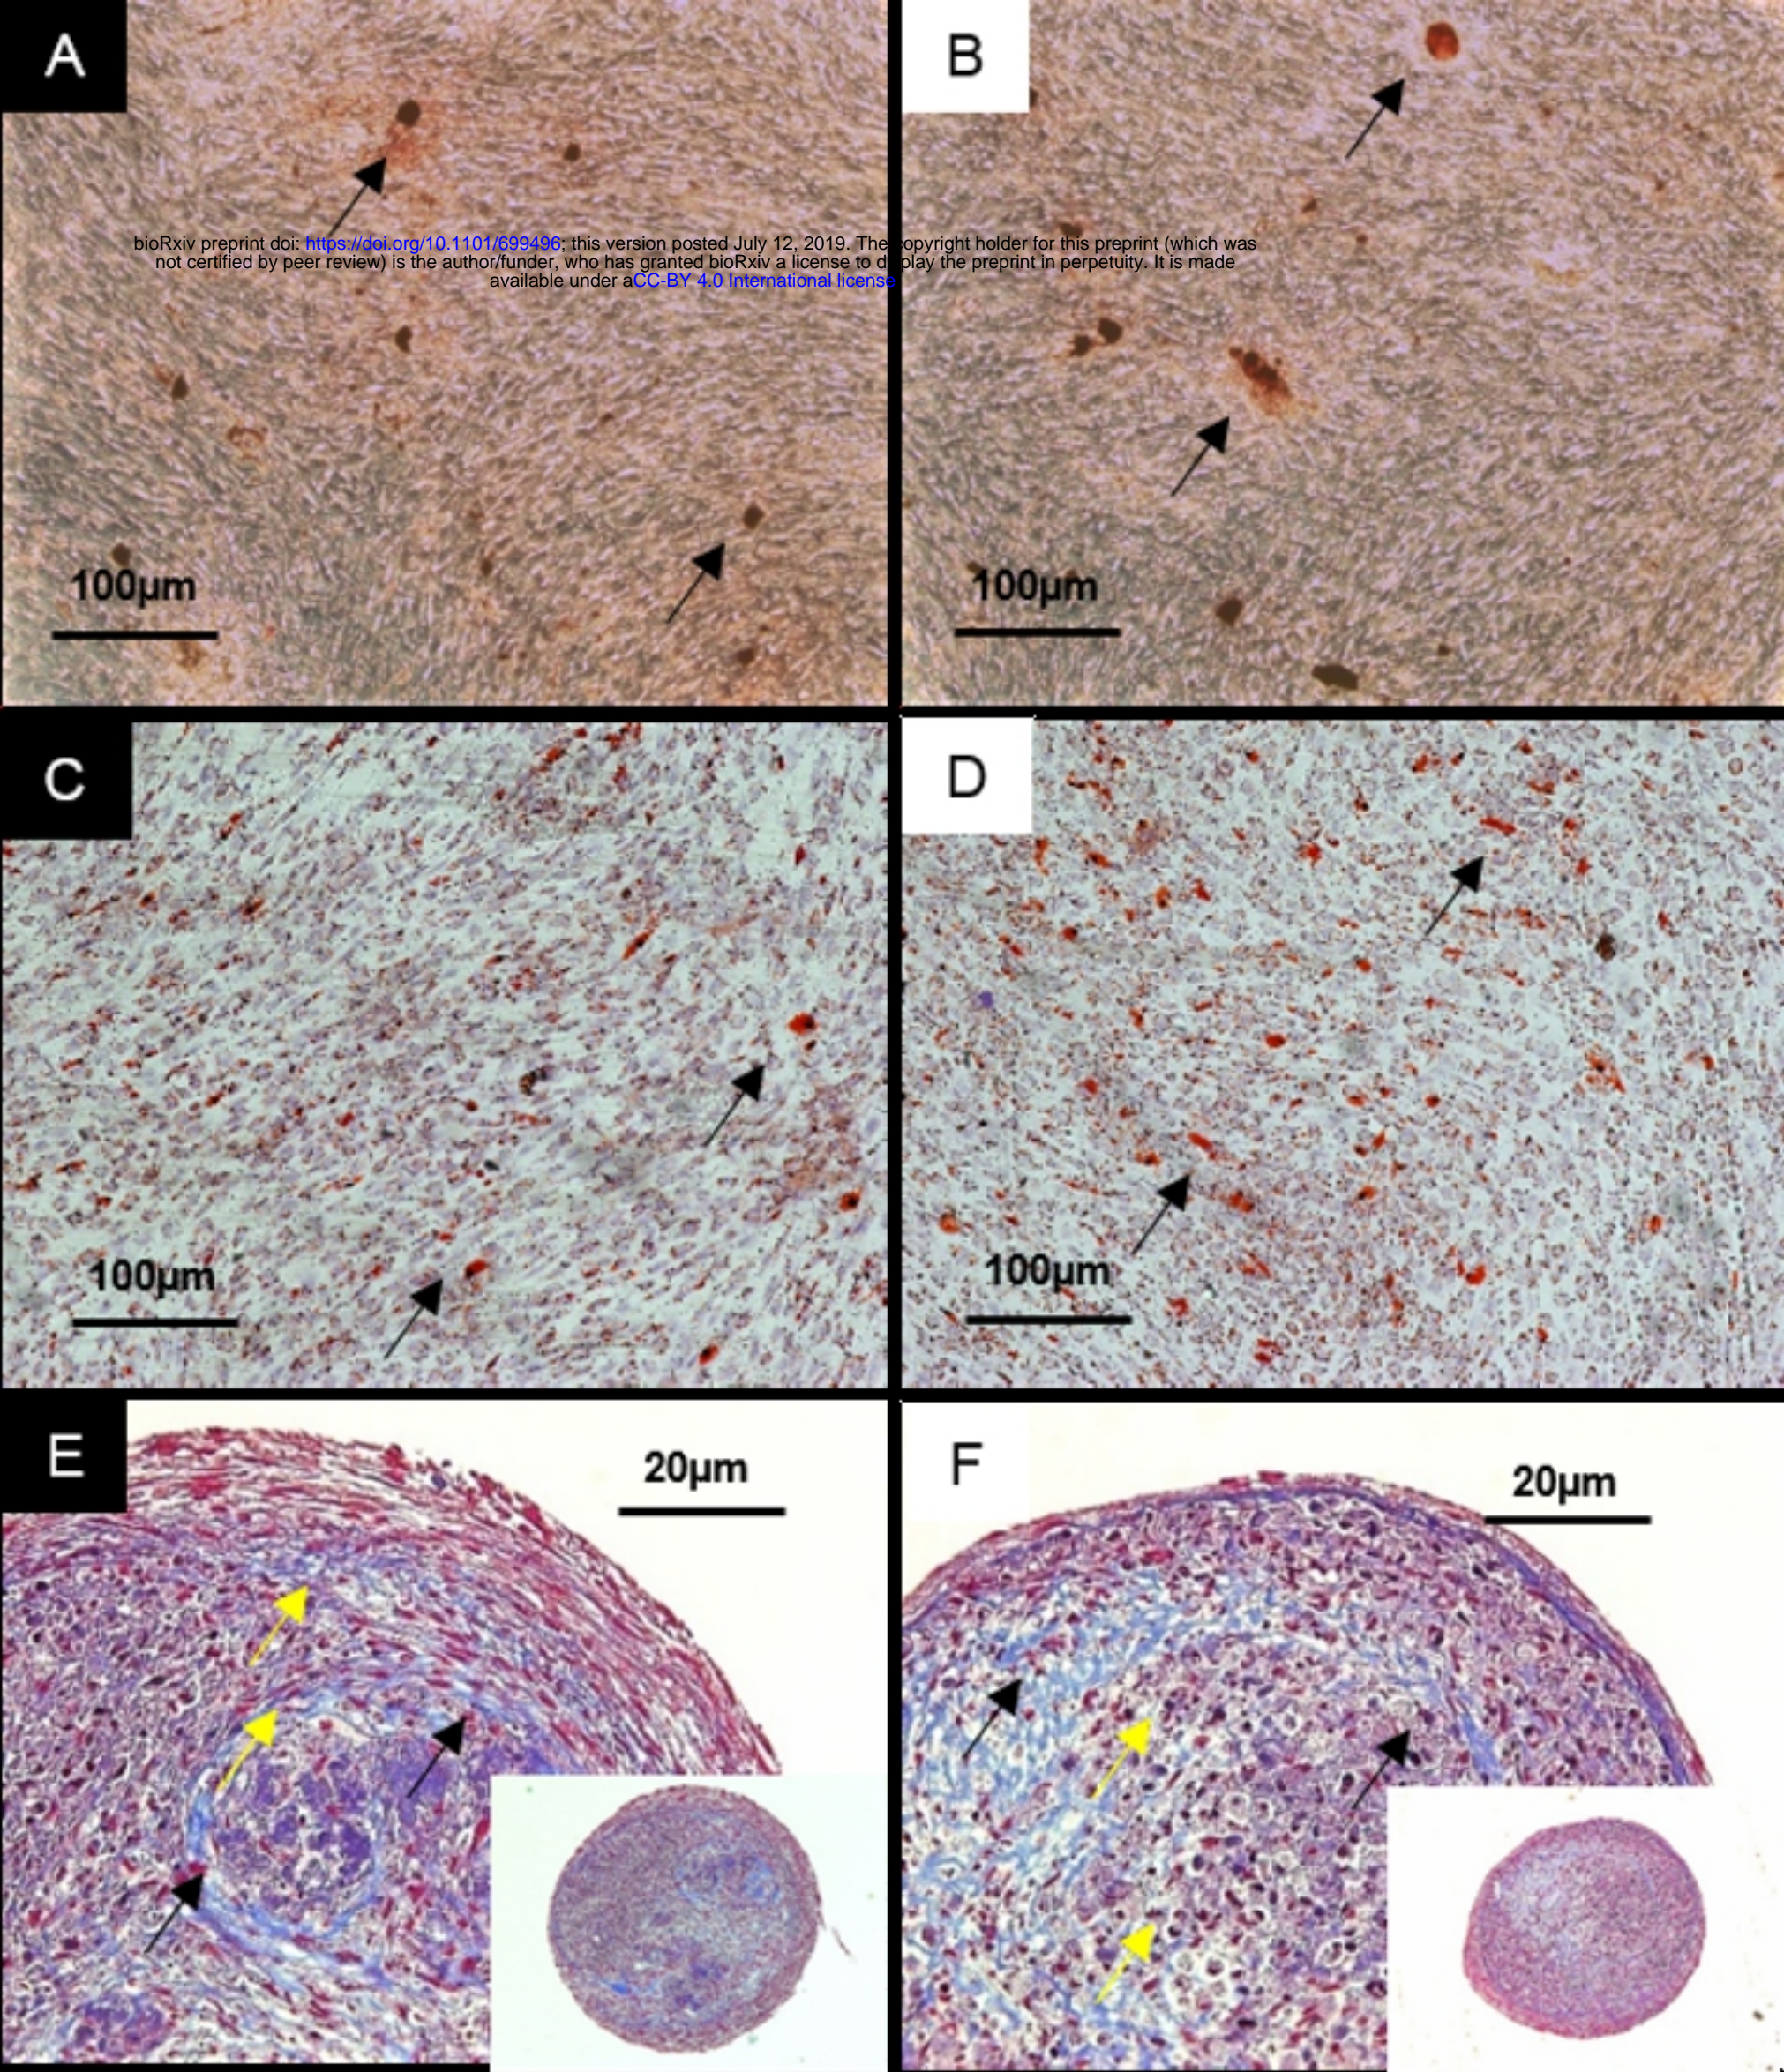

Figure 3



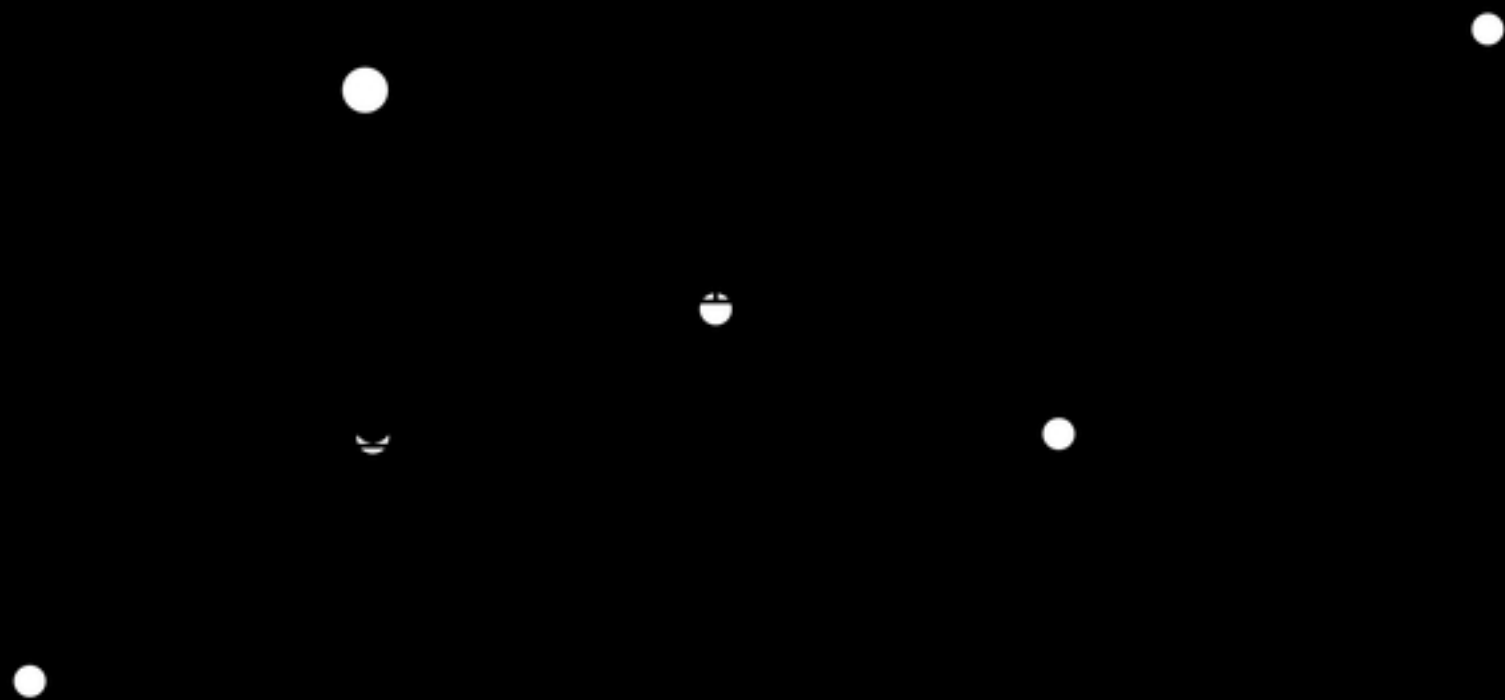

Figure 4
